# Supplementary material
Source: publisher figshare collection journal article supplement (https://karger.figshare.com/ndownloader/files/40872485)
Supplement: Supplementary file 1 [file 40872485]

SUPPLEMENTARY FILE

**Table 1 |** Questionnaire results for the 38 RTRs in the first year post transplant – repeated measurements (N=130).

| **Questionnaire results [median (IQR)]** | | |
| --- | --- | --- |
| Q General | 1.4 (1.175-1.825) |
| Q physical | 1.4 (1-1.8) |
| Q mental | 1.2 (1-1.8) |

**Table 2 |** Multivariable model for the association between mean Q mental score and the different variables tested, including the interaction between prednisone or MPA and tacrolimus blood level.

| **Effect** | **Mean (95% CI)** | **P value** |
| --- | --- | --- |
| Gender (female vs. male) | 0.34 [(-0.14)-0.82)] | 0.17 |
| Age at questionnaire (for every increase of 1 year) | 0.007 [(-0.0)-0.02] | 0.35 |
| Time post transplantation (for every increase of 1 month) | 0.01 [(-0.06)-0.08] | 0.73 |
| Dialysis pre-transplantation (yes/no) | (-0.06) [(-0.44)-0.32)] | 0.75 |
| Diabetes (yes/no) | 0.08 [(-0.32)-0.48] | 0.7 |
| Medication use (yes/no) | | |
| MPA | 1.04 (0.27-1.8) | **0.008**** |
| Prednisone | 0.66 [(-0.61)-1.94] | 0.31 |
| Laboratory results | | |
| Absolute lymphocytes (per 1 K/μL increase) | (-0.02) [(-0.23)-0.19)] | 0.83 |
| Tacrolimus blood level (per 1 ng/mL increase) | 0.005 [(-0.12) – (0.13)] | 0.93 |
| Prednisone use × tacrolimus blood level | (-0.03) [(-0.13)-0.08] | 0.63 |
| MPA use × tacrolimus blood level | (-0.04) [(-0.1)-0.02] | 0.22 |

*CI, confidence interval; MPA, mycophenolic acid.*

*Number in bold indicates significant at ** p<0.01.*

**Table 3 |** Biochemical characteristics of the cohort of 94 RTRs >1 year post transplant.

| **Laboratory results** |  |
| --- | --- |
| WBC (K/μL), [mean (SD)] | 7.8 (2.17) |
| Absolute neutrophils (K/μL), [mean (SD)] | 4.8 (1.67) |
| Absolute lymphocytes (K/μL), [mean (SD)] | 2.08 (0.74) |
| NLR, [median (IQR)] | 2.28 (1.7-3) |
| Hb (g/dL), [median (IQR)] | 13.49 (12.6-14.49) |
| Scr (mg/dL), [mean (SD)] | 1.16 (0.28) |
| eGFR (ml/min), [median (IQR)] | 51.14 (42.43-65.29) |
| Tacrolimus blood level (ng/mL), [median (IQR)] | 7.15 (5.82-8.27) |
| CRP (mg/L), [median (IQR)] | 2.74 (1.34-5.45) |
| Albumin (g/dL), [mean (SD)] | 4.06 (0.35) |
| Globulins (g/dL), [mean (SD)] | 2.62 (0.53) |

*CRP, C-reactive protein; eGFR, estimated glomerular filtration rate; Hb, hemoglobin; NLR, neutrophil-to-lymphocyte ratio; RTR, renal transplant recipient; Scr, serum creatinine; SD, standard deviation;*

*WBC, white blood cells*

**Table 4 |** Mean questionnaire results for the cohort of 94 RTRs>1 year post transplant.

| **Parameter** | **Score** |
| --- | --- |
| **Specific Questions** | **[mean (SD)]** |
| Fatigue | 1.8 (1.06) |
| Muscle weakness | 1.5 (0.85) |
| Night sweats | 1.23 (0.646) |
| Joint pain | 1.44 (0.82) |
| Tremor | 1.43 (0.92) |
| Sleep disorder | 1.72 (1.01) |
| Restlessness | 1.49 (0.98) |
| Depression | 1.49 (1.05) |
| Difficulty falling asleep | 1.61 (1.039) |
| Anxiety | 1.37 (0.89) |
| **Questionnaire** | **[median (IQR)]** |
| Q General | 1.2 (1-1.7) |
| Q physical | 1.2 (1-1.8) |
| Q mental | 1.2 (1-1.6) |

*RTR, renal transplant recipient; SD, standard deviation*
